# Supplementary material for: Factors Involved on Tiger-Stripe Foliar Symptom Expression of Esca of Grapevine
Source: MDPI journal article supplement (doi:10.3390/plants10061041), 2021-05-21
Supplement: s1 [file s1]

**Table S1.** Phosphorus and potassium content in never leaf-symptomatic vine leaves and in different categories of leaves of diseased vines.

|           | BBCH 71                          | BBCH 75    |            | BBCH 85    |            | BBCH 89    |            |
|-----------|----------------------------------|------------|------------|------------|------------|------------|------------|
|           | 27/06/2020                       | 11/07/2019 | 09/07/2020 | 27/08/2019 | 27/08/2020 | 12/09/2019 | 12/09/2020 |
| Treatment | Phosphorus (mg g <sup>-1</sup> ) |            |            |            |            |            |            |
| NLSnt     | 0.58 a                           | 0.49 a     | 0.30 b     | 0.82 ab    | 0.45 c     | 0.59 bc    | 0.44 c     |
| NLSt      | 0.51 a                           | 0.40 a     | 0.33 b     | 0.53 b     | 0.60 abc   | 0.61 bc    | 0.55 bc    |
| ASnt      | 0.54 a                           | 0.53 a     | 0.59 a     | 1.04 a     | 0.61 abc   | 1.16 a     | 0.73 a     |
| ASt       | 0.49 a                           | 0.44 a     | 0.31 b     | 0.50 b     | 0.41 c     | 0.41 c     | 0.59 abc   |
| PRE-Snt   | n.p.                             | 0.47 a     | 0.59 a     | 0.54 b     | 0.68 ab    | 0.71 bc    | 0.75 a     |
| PRE-St    | n.p.                             | n.p.       | n.p.       | 0.57 b     | 0.54 bc    | 0.60 bc    | 0.69 ab    |
| ASTIGRnt  | n.p.                             | 0.44 a     | 0.31 b     | 0.81 ab    | 0.79 a     | 0.61 bc    | 0.54 bc    |
| ASTIGRt   | n.p.                             | n.p.       | n.p.       | 0.51 b     | 0.54 bc    | 0.53 c     | 0.49 c     |
| TIGRnt    | n.p.                             | 0.47 a     | 0.65 a     | 0.96 a     | 0.76 ab    | 0.59 bc    | 0.72 a     |
| TIGRt     | n.p.                             | n.p.       | n.p.       | 0.49 b     | 0.72 ab    | 0.86 ab    | 0.68 ab    |
| Treatment | Potassium (mg g <sup>-1</sup> )  |            |            |            |            |            |            |
| NLSnt     | 2.45 a                           | 3.17 ab    | 2.62 a     | 2.71 a     | 2.00 cd    | 4.02 bc    | 2.17 abcd  |
| NLSt      | 2.16 a                           | 2.27 b     | 2.48 a     | 3.27 a     | 1.92 d     | 2.78 de    | 1.66 cd    |
| ASnt      | 2.30 a                           | 3.36 ab    | 2.93 a     | 3.43 a     | 2.42 abcd  | 5.22 a     | 1.93 abcd  |
| ASt       | 2.07 a                           | 2.68 ab    | 2.37 a     | 3.07 a     | 2.15 cd    | 2.75 de    | 2.38 ab    |
| PRE-Snt   | n.p.                             | 3.65 a     | 3.02 a     | 3.32 a     | 2.62 abc   | 3.38 bcd   | 2.00 abcd  |
| PRE-St    | n.p.                             | n.p.       | n.p.       | 2.62 a     | 2.28 bcd   | 2.95 cde   | 1.85 bcd   |
| ASTIGRnt  | n.p.                             | 3.13 ab    | 2.62 a     | 3.03 a     | 2.90 ab    | 4.33 ab    | 1.53 d     |
| ASTIGRt   | n.p.                             | n.p.       | n.p.       | 2.99 a     | 2.30 abcd  | 3.48 bcd   | 1.95 abcd  |
| TIGRnt    | n.p.                             | 3.65 a     | 2.45 a     | 3.52 a     | 2.93 a     | 2.53 de    | 2.25 abc   |
| TIGRt     | n.p.                             | n.p.       | n.p.       | 2.58 a     | 2.57 abc   | 1.78 e     | 2.53 a     |

NLS = never leaf-symptomatic vine leaves; AS = asymptomatic diseased vine leaves; PRE-S = pre-symptomatic leaves of symptomatic vines; ASTIGR = asymptomatic leaves of symptomatic vines; TIGR = tiger-striped leaves of symptomatic vines. t = treated with fertilizer mixture; nt = untreated; n.p. = not present category. For each column of each year, values followed by the same letter do not differ statistically according to Tukey's honest significant difference (HSD) test at  $p = 0.05$ .

**Table S2.** Iron and Copper content in never leaf-symptomatic vine leaves and in different categories of leaves of diseased vines.

|           | BBCH 71                       | BBCH 75    |            | BBCH 85    |            | BBCH 89    |            |
|-----------|-------------------------------|------------|------------|------------|------------|------------|------------|
|           | 27/06/2020                    | 11/07/2019 | 09/07/2020 | 27/08/2019 | 27/08/2020 | 12/09/2019 | 12/09/2020 |
| Treatment | Iron (mg Kg <sup>-1</sup> )   |            |            |            |            |            |            |
| NLSnt     | 16.8 b                        | 43.1 a     | 22.3 a     | 65.0 b     | 23.5 c     | 57.3 b     | 28.8 bc    |
| NLSt      | 21.8 a                        | 35.0 a     | 29.0 a     | 62.7 b     | 29.8 bc    | 71.8 b     | 46.3 ab    |
| ASnt      | 17.7 b                        | 39.3 a     | 27.2 a     | 59.0 b     | 43.2 a     | 74.5 b     | 23.7 c     |
| ASt       | 19.7 ab                       | 43.4 a     | 31.7 a     | 67.7 b     | 33.0 abc   | 78.8 b     | 39.7 abc   |
| PRE-Snt   | n.p.                          | 44.6 a     | 26.0 a     | 64.3 b     | 35.5 abc   | 58.2 b     | 35.3 abc   |
| PRE-St    | n.p.                          | n.p.       | n.p.       | 67.3 b     | 27.5 bc    | 65.3 b     | 34.2 abc   |
| ASTIGRnt  | n.p.                          | 34.9 a     | 27.8 a     | 67.0 b     | 39.5 ab    | 94.7 ab    | 32.3 abc   |
| ASTIGRt   | n.p.                          | n.p.       | n.p.       | 69.8 ab    | 36.5 ab    | 67.0 b     | 34.5 abc   |
| TIGRnt    | n.p.                          | 35.4 a     | 23.2 a     | 82.3 ab    | 37.5 ab    | 130.6 ab   | 50.3 a     |
| TIGRt     | n.p.                          | n.p.       | n.p.       | 95.2 a     | 37.5 ab    | 94.5 ab    | 38.7 abc   |
| Treatment | Copper (mg Kg <sup>-1</sup> ) |            |            |            |            |            |            |
| NLSnt     | 154.1 a                       | 178.7 a    | 215.0 bc   | 224.5 ab   | 344.3 b    | 225.6 b    | 377.3 a    |
| NLSt      | 133.8 a                       | 118.00 ab  | 268.0 abc  | 162.8 b    | 446.2 ab   | 208.5 b    | 413.2 a    |
| ASnt      | 178.7 a                       | 83.7 ab    | 275.5 abc  | 209.8 ab   | 556.5 a    | 225.8 b    | 370.0 a    |
| ASt       | 143.5 a                       | 159.8 ab   | 323.2 ab   | 217.8 ab   | 345.3 b    | 170.2 b    | 348.2 a    |
| PRE-Snt   | n.p.                          | 52.8 b     | 186.2 c    | 187.3 b    | 307.3 b    | 149.5 b    | 349.2 a    |
| PRE-St    | n.p.                          | n.p.       | n.p.       | 251.2 ab   | 388.0 ab   | 188.3 b    | 257.0 a    |
| ASTIGRnt  | n.p.                          | 52.0 b     | 341.5 a    | 262.2 ab   | 405.5 ab   | 204.7 b    | 445.0 a    |
| ASTIGRt   | n.p.                          | n.p.       | n.p.       | 241.6 ab   | 434.8 ab   | 138.4 b    | 342.8 a    |
| TIGRnt    | n.p.                          | 54.9 b     | 206.5 c    | 232.8 ab   | 366.0 b    | 367.5 ab   | 330.4 a    |
| TIGRt     | n.p.                          | n.p.       | n.p.       | 385.5 a    | 427.0 ab   | 274.7 ab   | 333.8 a    |

NLS = never leaf-symptomatic vine leaves; AS = asymptomatic diseased vine leaves; PRE-S = pre-symptomatic leaves of symptomatic vines; ASTIGR = asymptomatic leaves of symptomatic vines; TIGR = tiger-striped leaves of symptomatic vines. t = treated with fertilizer mixture; nt = untreated; n.p. = not present category. For each column of each year, values followed by the same letter do not differ statistically according to Tukey's honest significant difference (HSD) test at  $p = 0.05$ .

**Table S3.** Manganese and Zinc content in never leaf-symptomatic vine leaves and in different categories of leaves of diseased vines.

|           | BBCH 71                          | BBCH 75    |            | BBCH 85    |            | BBCH 89    |            |
|-----------|----------------------------------|------------|------------|------------|------------|------------|------------|
|           | 27/06/2020                       | 11/07/2019 | 09/07/2020 | 27/08/2019 | 27/08/2020 | 12/09/2019 | 12/09/2020 |
| Treatment | Manganese (mg Kg <sup>-1</sup> ) |            |            |            |            |            |            |
| NLSnt     | 35.3 a                           | 89.6 a     | 34.8 ab    | 53.8 ab    | 31.5 b     | 66.2 a     | 34.0 ab    |
| NLSt      | 39.0 a                           | 60.5 a     | 45.5 ab    | 44.5 b     | 29.3 b     | 66.3 a     | 44.1 ab    |
| ASnt      | 35.6 a                           | 70.0 a     | 32.6 ab    | 56.1 ab    | 51.7 a     | 85.0 a     | 26.3 b     |
| ASt       | 42.5 a                           | 89.2 a     | 52.0 a     | 62.3 ab    | 40.3 ab    | 56.5 a     | 38.4 ab    |
| PRE-Snt   | n.p.                             | 50.7 a     | 21.4 b     | 49.1 ab    | 35.5 b     | 46.2 a     | 38.6 ab    |
| PRE-St    | n.p.                             | n.p.       | n.p.       | 78.8 a     | 37.3 ab    | 59.5 a     | 32.7 ab    |
| ASTIGRnt  | n.p.                             | 60.8 a     | 57.8 a     | 59.0 ab    | 39.7 ab    | 66.8 a     | 39.3 ab    |
| ASTIGRt   | n.p.                             | n.p.       | n.p.       | 44.2 b     | 34.1 b     | 60.0 a     | 47.6 a     |
| TIGRnt    | n.p.                             | 59.7 a     | 40.0 ab    | 71.0 ab    | 34.5 b     | 62.2 a     | 36.3 ab    |
| TIGRt     | n.p.                             | n.p.       | n.p.       | 58.3 ab    | 42.5 ab    | 79.3 a     | 48.7 a     |
| Treatment | Zinc (mg Kg <sup>-1</sup> )      |            |            |            |            |            |            |
| NLSnt     | 9.8 a                            | 21.3 a     | 9.02 ab    | 13.8 a     | 7.8 b      | 18.0 ab    | 8.0 abcd   |
| NLSt      | 9.9 a                            | 14.7 a     | 10.2 a     | 16.1 a     | 11.03 a    | 12.3 b     | 8.1 abcd   |
| ASnt      | 9.6 a                            | 17.1 a     | 8.1 ab     | 14.5 a     | 9.07 ab    | 15.5 ab    | 7.7 bcd    |
| ASt       | 10.7 a                           | 18.9 a     | 9.2 ab     | 19.3 a     | 7.52 b     | 15.1 ab    | 9.9 abc    |
| PRE-Snt   | n.p.                             | 13.3 a     | 6.8 b      | 14.5 a     | 11.43 a    | 14.2 ab    | 10.3 a     |
| PRE-St    | n.p.                             | n.p.       | n.p.       | 18.2 a     | 9.18 ab    | 12.7 b     | 9.0 abcd   |
| ASTIGRnt  | n.p.                             | 14.1 a     | 9.2 ab     | 15.1 a     | 8.95 ab    | 16.0 ab    | 7.6 cd     |
| ASTIGRt   | n.p.                             | n.p.       | n.p.       | 15.8 a     | 8.60 ab    | 12.6 b     | 6.9 d      |
| TIGRnt    | n.p.                             | 13.3 a     | 9.3 a      | 17.7 a     | 9.25 ab    | 20.3 a     | 10.1 ab    |
| TIGRt     | n.p.                             | n.p.       | n.p.       | 18.3 a     | 10.62 ab   | 13.0 ab    | 10.1 ab    |

NLS = never leaf-symptomatic vine leaves; AS = asymptomatic diseased vine leaves; PRE-S = pre-symptomatic leaves of symptomatic vines; ASTIGR = asymptomatic leaves of symptomatic vines; TIGR = tiger-striped leaves of symptomatic vines. t = treated with fertilizer mixture; nt = untreated; n.p. = not present category. For each column of each year, values followed by the same letter do not differ statistically according to Tukey's honest significant difference (HSD) test at  $p = 0.05$ .
